# Supplementary material for: Development of a Bioassay for Continuous Monitoring of TWIST1 Activity
Source: Preprints.org preprint supplement (doi:10.20944/preprints202103.0265.v1), 2021-03-09
Supplement: Supplementary file 2 [file RAW DATA.xlsx]

## Sheet: GLuc
Application: Tecan i-control				Tecan i-control , 1.7.1.12
Device: infinite 200Pro				Serial number: 1105007938				Serial number of connected stacker:
Firmware: V_3.22_12/10_Infinite (Dec 14 2010/13.07.14)				MAI, V_3.22_12/10_Infinite (Dec 14 2010/13.07.14)
Date:	2019-12-17
Time:	13:45:33
System				UMLUB-KOMPUTER
User				umlub-Komputer\umlub
Plate				4titude 96 96 Flat Bottom black/white polistyren [4titude96bw.pdfx]
Plate-ID (Stacker)
Label: Label1
Mode				Luminescence
Attenuation				NONE
Integration Time				1000	ms
Settle Time				0	ms
Part of Plate				A1-A12
Start Time:	2019-12-17 13:45:36
															bGAL
	K	TAMOXIFEN	PROPOFOL	pH	tgfB	TWIST1	K	TAMOXIFEN	PROPOFOL	pH	tgfB	TWIST1
<>	1	2	3	4	5	6	7	8	9	10	11	12			<>	1	2	3	4	5	6	7	8	9	10	11	12
A	13394	11012	12120	497	9243	6315	364497	329702	434282	4969	300166	136622			A	0.121	0.1211	0.1145	0.0594	0.0927	0.1187	0.1684	0.1962	0.2106	0.0574	0.1599	0.1482
A	14339	11794	13315	656	10520	6202	341296	289012	348805	17280	315868	116392			B	0.1161	0.1244	0.1011	0.0599	0.092	0.1117	0.1741	0.1899	0.2004	0.0554	0.1503	0.1472
A	12307	9699	13545	526	9857	6005	423493	370002	409040	10173	283134	141891			C	0.1203	0.1218	0.1127	0.0544	0.0725	0.0763	0.2118	0.203	0.1851	0.0592	0.1839	0.1525
B	18450	15241	12545	625	10488	7614	391306	375985	451308	13021	291933	137428			D	0.1143	0.1529	0.1304	0.0549	0.0711	0.1099	0.2305	0.2067	0.2249	0.0558	0.2102	0.1943
B	10129	10130	9103	957	8289	6360	249428	318019	356528	14219	265950	111488			E	0.1884	0.1486	0.1714	0.0557	0.1756	0.1467	0.0997	0.0958	0.1083	0.1432	0.1152	0.1687
B	9547	7743	10246	879	7275	6108	381667	260189	406875	15661	224138	117568			F	0.214	0.1718	0.1895	0.0648	0.1592	0.1507	0.0919	0.0823	0.1007	0.1663	0.114	0.1565
C	16957	13736	11161	1362	8900	6717	440542	345512	386600	8081	286675	123889			G	0.208	0.1504	0.1706	0.0532	0.1358	0.1203	0.1021	0.094	0.1249	0.151	0.1108	0.1528
C	11434	11770	11156	1008	7090	5978	424701	327481	266597	11144	217102	117925			H	0.2544	0.2063	0.2011	0.0557	0.2011	0.1371	0.1203	0.1012	0.1518	0.2082	0.1484	0.2117
C	17303	13568	10435	1061	8481	6552	475308	352107	399693	7728	309920	137799
D	20133	19919	16866	1686	11559	7489	533173	411294	517012	22395	396658	184140			0
D	12608	12426	14880	1169	10370	7965	401900	373320	452531	16735	340355	132660
D	17321	17011	16805	1550	11139	7197	580261	347258	536797	17407	330857	165127			0.0483
E	180333	111805	121904	3342	116612	41640	5742	6510	136265	203517	30076	77109
E	163003	104374	107154	2801	84774	40492	4718	7620	122951	191382	27671	71391			<>	1	2	3	4	5	6	7	8	9	10	11	12
E	196341	119378	136426	2431	129091	47288	6542	7393	157879	230691	33465	91007			A	0.0727	0.0728	0.0662	0.0111	0.0444	0.0704	0.1201	0.1479	0.1623	0.0091	0.1116	0.0999
F	163115	100085	110557	2690	71850	26032	4900	5179	140695	206021	25520	49320			B	0.0678	0.0761	0.0528	0.0116	0.0437	0.0634	0.1258	0.1416	0.1521	0.0071	0.102	0.0989
F	177273	116915	132865	2554	79573	37728	6165	4886	152120	201239	25801	55629			C	0.072	0.0735	0.0644	0.0061	0.0242	0.028	0.1635	0.1547	0.1368	0.0109	0.1356	0.1042
F	185557	127617	148105	2773	88549	38756	5971	5736	151975	228089	30631	68606			D	0.066	0.1046	0.0821	0.0066	0.0228	0.0616	0.1822	0.1584	0.1766	0.0075	0.1619	0.146
G	159759	98831	99988	1723	85707	29467	6387	6302	145337	197062	31047	65887			E	0.1401	0.1003	0.1231	0.0074	0.1273	0.0984	0.0514	0.0475	0.06	0.0949	0.0669	0.1204
G	137672	56764	113513	1624	63007	29391	5490	4030	114879	124309	20578	60087			F	0.1657	0.1235	0.1412	0.0165	0.1109	0.1024	0.0436	0.034	0.0524	0.118	0.0657	0.1082
G	202961	97484	151400	1671	103711	33165	7559	7905	162011	220995	27138	65776			G	0.1597	0.1021	0.1223	0.0049	0.0875	0.072	0.0538	0.0457	0.0766	0.1027	0.0625	0.1045
H	274363	172764	152766	3570	138589	42324	8278	6685	187250	206381	32834	86514			H	0.2061	0.158	0.1528	0.0074	0.1528	0.0888	0.072	0.0529	0.1035	0.1599	0.1001	0.1634
H	273428	202724	185560	3147	154855	45196	9530	9132	193424	287623	43730	93113
H	239305	150369	167526	3261	152423	51043	8944	8251	162846	250721	40180	91329
	K	TAMOXIFEN	PROPOFOL	pH	tgfB	TWIST1	K	TAMOXIFEN	PROPOFOL	pH	tgfB	TWIST1
<>	1	2	3	4	5	6	7	8	9	10	11	12
A	183586	148832	196274	50420.4	222372	87698.9	3.13429e+06	2.22834e+06	2.4484e+06	1.18762e+06	2.68569e+06	1.31767e+06
B	221711	160902	248769	51925.3	235431	104211	3.06331e+06	2.43644e+06	2.64991e+06	1.90019e+06	2.91155e+06	1.33371e+06
C	189287	159048	182158	115191	394408	237845	2.16968e+06	2.29262e+06	2.9651e+06	1.14413e+06	2.0674e+06	1.25018e+06
D	192556	105526	129492	124293	380877	108669	1.87047e+06	2.00798e+06	2.29277e+06	1.90671e+06	1.61009e+06	836721
E	87159.2	105048	82615.8	144054	64058.7	64989.8	6.94966e+06	6.48225e+06	6.38891e+06	133337	3.87027e+06	977146
F	76318.6	89740.9	76872	65636.4	69927.9	61207.7	9.53295e+06	9.14884e+06	6.74346e+06	98548	3.69313e+06	1.10715e+06
G	95374.7	127568	89266.8	233401	93222.9	89106.5	8.30577e+06	7.47702e+06	4.58177e+06	87481.3	4.33972e+06	1.21089e+06
H	79039.3	95478.9	83894	169144	59184.1	75146.4	6.6351e+06	6.87386e+06	3.81096e+06	86026.7	3.07586e+06	897315
Kolumna1	K	TAMOXIFEN	PROPOFOL	pH	tgfB	TWIST1	Kolumna2	Kolumna3
FULL	196785	143577	189173	85457.5	308272	269212
minTBD	2.55944e+06	2.24135e+06	2.58905e+06	1.53466e+06	2.31868e+06	2.36914e+06
minP	84472.9	104459	83162.2	153059	71598.4	145225
			FULL
K	TAMOXIFEN	PROPOFOL	tgfB
183586	148832	196274	222372
221711	160902	248769	235431
189287	159048	182158	394408
192556	105526	129492	380877
minP
K	TAMOXIFEN	PROPOFOL	tgfB
87159.2	105048	82615.8	64058.7
76318.6	89740.9	76872	69927.9
95374.7	127568	89266.8	93222.9
79039.3	95478.9	83894	59184.1
Previous results
TAMOXIFEN
concentration	0	1	2	4	6	8
	144220	136849	121342	124657	99011	91089
	113612	105596	87323	102778	81564	37587
			99491	104869
	67416	68347	55345	59520	47241	43300
	52906	51962	48820	53785	42971	18285
				55510	32074
PROPOFOL
concentration	0	15	30	60
	119181	73676	65295.9	81937.2
	109049	68094	62517.8	88858.1
	97617	62211	57828.2	97497.3
	99099	65044	55629.5	67226.2
	93154	77580	60039.4	60712.7
	85072	70634	65717.7	53274.1
	121409	68984	46086.3	55868.3
	110354	61176	41050.1	49833
	96823	55905	36682	44097.8
LACTIC ACID & TGFB
	NC	Lactic acid	TGFB
	2645107	2528978	3926474
	2500442	2509915	3834648
	2581416	2493848	3852017
	2694058	2420941	4061164
	2569631	2360190	3940138
	2656092	2359628	3889634
		3445855
		3365918
		3193689
CELL LINES
	HeLa	HEK293	RC-124	HK-2
	431.77	207.4	174.5	170
	452.7	219.3	177.27	177.2
	405.27	196.25	188.19	162.7
			159.84

## Sheet: GLuc1
Application: Tecan i-control				Tecan i-control , 1.7.1.12
Device: infinite 200Pro				Serial number: 1105007938				Serial number of connected stacker:
Firmware: V_3.22_12/10_Infinite (Dec 14 2010/13.07.14)				MAI, V_3.22_12/10_Infinite (Dec 14 2010/13.07.14)
Date:	2019-12-17
Time:	15:51:48
System				UMLUB-KOMPUTER
User				umlub-Komputer\umlub
Plate				Nunclon 96 Flat Bottom Transparent Polystyrol [NUN96ft.pdfx]
Plate-ID (Stacker)
Label: Label1
Mode				Absorbance
Wavelength				420	nm
Bandwidth				9	nm
Number of Flashes				25
Settle Time				0	ms
Start Time:	2019-12-17 15:51:48
	Temperature: 25.8 °C
<>	1	2	3	4	5	6	7	8	9	10	11	12
A	0.1247	0.1217	0.1163	0.0605	0.0946	0.121	0.1702	0.1972	0.2127	0.0589	0.1618	0.1502
B	0.12	0.1266	0.1042	0.0621	0.0949	0.1145	0.1773	0.1925	0.2034	0.0572	0.1541	0.1503
C	0.1235	0.1244	0.1156	0.0562	0.0757	0.0795	0.2152	0.2053	0.1882	0.0612	0.1869	0.1559
D	0.1172	0.1556	0.1346	0.0571	0.0741	0.114	0.2341	0.2095	0.2279	0.0573	0.2147	0.1977
E	0.1919	0.1515	0.1755	0.0579	0.1798	0.1507	0.1029	0.0992	0.1116	0.1461	0.1188	0.171
F	0.2181	0.1752	0.194	0.0683	0.1685	0.154	0.0973	0.086	0.1048	0.1697	0.121	0.16
G	0.2112	0.1538	0.1755	0.0557	0.1364	0.1246	0.1062	0.0981	0.1286	0.1551	0.1161	0.1553
H	0.2578	0.2092	0.2036	0.0575	0.205	0.1408	0.1241	0.1039	0.1564	0.2117	0.153	0.2163
End Time:	2019-12-17 15:53:06

## Sheet: GLuc2
Application: Tecan i-control				Tecan i-control , 1.7.1.12
Device: infinite 200Pro				Serial number: 1105007938				Serial number of connected stacker:
Firmware: V_3.22_12/10_Infinite (Dec 14 2010/13.07.14)				MAI, V_3.22_12/10_Infinite (Dec 14 2010/13.07.14)
Date:	2019-12-23
Time:	13:58:44
System				UMLUB-KOMPUTER
User				umlub-Komputer\umlub
Plate				4titude 96 96 Flat Bottom black/white polistyren [4titude96bw.pdfx]
Plate-ID (Stacker)
Label: Label1
Mode				Luminescence
Attenuation				NONE
Integration Time				1000	ms
Settle Time				0	ms
Part of Plate				A1-A12
Start Time:	2019-12-23 13:58:47
	Temperature: 22 °C
<>	1	2	3	4	5	6	7	8	9	10	11	12
A	55031	61836	77049	50852	98380	28088	2194365	1302235	1804102	1503493	1727235	788774
B	69112	62400	38171	56264	91278	26532	1622978	1293365	1297221	1060875	1620726	676242
C	65402	65151	25567	48049	70748	34143	1773374	903954	902448	1223263	2101713	769898
D	59124	66155	59292	61411	88800	30628	1732956	1635001	1970537	1347641	1759293	522484
E	204912	171414	250833	161819	90689	56306	21266	13417	344772	408818	45461	49378
F	142574	49741	40673	41323	56238	20244	8440	8643	106301	227592	25598	30003
G	318785	70317	57668	44932	73816	55002	17311	10049	111085	286390	15582	33704
H	366633	198164	268457	188147	138254	80535	29624	19780	587262	480780	44743	56872
A	51165	62819	72884	46379	85248	30568	1902560	1238755	1689498	1315505	1629843	715608
B	64555	64874	35114	48009	77936	26225	1479875	1273055	1148299	980240	1374669	750974
C	71764	71664	23168	41412	76386	31106	1480226	897494	962013	1167888	1745303	654771
D	54221	55627	56876	60117	94237	28638	1753614	1707936	1953296	1348918	1704157	588076
E	161139	127344	227256	134445	74965	46152	19719	12132	339888	384268	42137	42300
F	114720	33365	30248	26706	40785	15106	5836	6717	76649	206735	19609	23626
G	285696	57953	47574	32205	48310	46199	13211	7005	83914	217480	9862	25414
H	280801	141980	211338	158718	105076	63708	24052	14529	532935	416742	36585	47671
A	50434	54607	73939	41855	101980	25775	2037484	1145629	1704360	1515036	1681991	679732
B	62858	62910	35674	47959	83849	25539	1995256	1411139	1141048	998538	1455324	697903
C	46572	47052	23909	35035	52627	27382	1404270	837791	844364	957119	1552500	531066
D	55195	48578	62998	53591	89854	29021	1674423	1659602	1882248	1365954	1730462	530009
E	157789	131859	224399	138722	82698	45539	18758	11917	358041	424089	44295	49076
F	119430	40743	33529	32261	46492	17590	6396	7618	87775	236354	21782	26674
G	267963	55093	48118	33309	51622	45242	14458	7859	91531	227716	10326	23297
H	198028	101360	147163	99075	79311	42961	15352	11605	307619	235462	24936	28394

## Sheet: GLuc3
Application: Tecan i-control				Tecan i-control , 1.7.1.12
Device: infinite 200Pro				Serial number: 1105007938				Serial number of connected stacker:
Firmware: V_3.22_12/10_Infinite (Dec 14 2010/13.07.14)				MAI, V_3.22_12/10_Infinite (Dec 14 2010/13.07.14)
Date:	2019-08-30
Time:	16:11:43
System				UMLUB-KOMPUTER
User				umlub-Komputer\umlub
Plate				4titude 96 96 Flat Bottom black/white polistyren [4titude96bw.pdfx]
Plate-ID (Stacker)
Label: Label1
Mode				Luminescence
Attenuation				NONE
Integration Time				10000	ms
Settle Time				0	ms
Part of Plate
Start Time:	2019-08-30 16:11:46
	Temperature: 28.2 °C
<>	7	8	9
A	958342	746175	679645	TAM 0
B	848617	713934	578466	TAM 2
C	729342	576770	421174	TAM 8
D	1320	1306	1344	NC
End Time:	2019-08-30 16:12:50

## Sheet: Gluc4
Application: Tecan i-control				Tecan i-control , 1.7.1.12
Device: infinite 200Pro				Serial number: 1105007938				Serial number of connected stacker:
Firmware: V_3.22_12/10_Infinite (Dec 14 2010/13.07.14)				MAI, V_3.22_12/10_Infinite (Dec 14 2010/13.07.14)
Date:	2019-04-11
Time:	14:01:07
System				UMLUB-KOMPUTER
User				umlub-Komputer\umlub
Plate				4titude 96 96 Flat Bottom black/white polistyren [4titude96bw.pdfx]
Plate-ID (Stacker)
Label: Label1
Mode				Luminescence
Attenuation				NONE
Integration Time				10000	ms
Settle Time				0	ms
Part of Plate				A1-A3
Start Time:	2019-04-11 14:01:10
	Temperature: 29.8 °C
<>	1	2	3		TAMOXIFEN
A	67416	52906	37307		0
B	68347	51962	33916		1
C	55345	42528	48820		2
D	59520	53785	55510		4
E	47241	42971	32074		6
F	43300	8100	18285		8
G	11077	17481	18836		10

## Sheet: GLuc5
Application: Tecan i-control				Tecan i-control , 1.7.1.12
Device: infinite 200Pro				Serial number: 1105007938				Serial number of connected stacker:
Firmware: V_3.22_12/10_Infinite (Dec 14 2010/13.07.14)				MAI, V_3.22_12/10_Infinite (Dec 14 2010/13.07.14)
Date:	2019-05-20
Time:	14:03:58
System				UMLUB-KOMPUTER
User				umlub-Komputer\umlub
Plate				4titude 96 96 Flat Bottom black/white polistyren [4titude96bw.pdfx]
Plate-ID (Stacker)
Label: Label1
Mode				Luminescence
Attenuation				NONE
Integration Time				10000	ms
Settle Time				0	ms
Part of Plate
Start Time:	2019-05-20 14:04:01
	Temperature: 25 °C
<>	1	2	3	4	5	6	7	8	9	10	11	12
A	818	752	790	901	862	803	795	766	790	102835	93960	86691
B	2645107	2500442	2581416	1551844	1529410	1525999	2694058	2569631	2656092	124651	112167	106884
C	2528978	2509915	2493848	2420941	2360190	2359628	3445855	3365918	3193689	66642	63060	57619
D	3926474	3834648	3852017	4061164	3940138	3889634	159075	116394	94809	63605	58859	55191
E	1281	1861	1994	887	833	895	863	883	915	10565	9705	9020
F	81465	80113	81371	74990	75010	75583	101777	100205	97049	9934	9218	8400
G	70882	64880	68835	33709	29294	31326	73344	68680	67136
H	58055	53847	52652	57743	53447	50926	61139	57830	52455

## Sheet: GLuc6
Application: Tecan i-control				Tecan i-control , 1.7.1.12
Device: infinite 200Pro				Serial number: 1105007938				Serial number of connected stacker:
Firmware: V_3.22_12/10_Infinite (Dec 14 2010/13.07.14)				MAI, V_3.22_12/10_Infinite (Dec 14 2010/13.07.14)
Date:	2019-05-24
Time:	15:26:40
System				UMLUB-KOMPUTER
User				umlub-Komputer\umlub
Plate				4titude 96 96 Flat Bottom black/white polistyren [4titude96bw.pdfx]
Plate-ID (Stacker)
Label: Label1
Mode				Luminescence
Attenuation				NONE
Integration Time				10000	ms
Settle Time				0	ms
Part of Plate				A1-A3
Start Time:	2019-05-24 15:26:43
	Temperature: 25.3 °C
<>	1	2	3	4	5	6	7	8	9
A	872	861	863	863	872	908	917	973	965
B	119181	109049	97617	99099	93154	85072	121409	110354	96823
C	94237	85485	78060	115676	104023	98208	113000	101801	93523
D	92338	85270	78341	97706	89883	81981	90764	81412	75384
E	42554	39032	36284	52910	48115	43967	46399	42340	37985
F	73676	68094	62211	77580	70634	65044	68984	61176	55905
G	62544	59883	55391	62948	57509	53285	44144	39320	35136
H	62711	56635	49696	90949	82890	76434	52116	46486	41136

## Sheet: GLuc7
Application: Tecan i-control				Tecan i-control , 1.7.1.12
Device: infinite 200Pro				Serial number: 1105007938				Serial number of connected stacker:
Firmware: V_3.22_12/10_Infinite (Dec 14 2010/13.07.14)				MAI, V_3.22_12/10_Infinite (Dec 14 2010/13.07.14)
Date:	2019-05-16
Time:	13:52:04
System				UMLUB-KOMPUTER
User				umlub-Komputer\umlub
Plate				4titude 96 96 Flat Bottom black/white polistyren [4titude96bw.pdfx]
Plate-ID (Stacker)
Label: Label1
Mode				Luminescence
Attenuation				NONE
Integration Time				10000	ms
Settle Time				0	ms
Part of Plate
Start Time:	2019-05-16 13:52:07
	Temperature: 24.5 °C
<>	1	2	3
A	17762	16093	50169
B	15768	14946	43936
C	15286	12145	41543
D	14918	32070	1159
E	15438	30398	1132
F	12741	26134	1096

## Sheet: BGal
Application: Tecan i-control				Tecan i-control , 1.7.1.12
Device: infinite 200Pro				Serial number: 1105007938				Serial number of connected stacker:
Firmware: V_3.22_12/10_Infinite (Dec 14 2010/13.07.14)				MAI, V_3.22_12/10_Infinite (Dec 14 2010/13.07.14)
Date:	2020-01-02
Time:	13:50:58
System				UMLUB-KOMPUTER
User				umlub-Komputer\umlub
Plate				Corning 96 Flat Bottom Transparent Polystyrol [COS96ft.pdfx]
Plate-ID (Stacker)
Label: Label1
Mode				Absorbance
Wavelength				420	nm
Bandwidth				9	nm
Number of Flashes				25
Settle Time				0	ms
Start Time:	2020-01-02 13:50:58
	Temperature: 23.6 °C
<>	1	2	3	4	5	6	7	8	9	10	11	12
A	1.6489	1.2849	1.4751	1.3386	2.3514	1.0266	1.874	1.5296	1.7434	1.7041	2.2372	1.2134
B	1.5426	1.2715	0.8683	1.2301	2.2513	0.8489	1.4541	1.3207	1.0729	1.2231	2.2186	1.0176
C	1.4389	1.1287	0.4566	1.1264	1.6622	0.9153	1.3889	1.0353	0.9884	1.2897	2.2746	0.9518
D	1.473	1.194	1.2283	1.4825	2.0933	0.9923	1.4548	1.6241	1.7348	1.6803	2.0799	0.8784
E	1.437	1.286	1.5268	1.2427	2.0287	0.6781	1.0687	0.8281	0.9114	1.0059	1.2916	1.3717
F	1.1955	0.5038	0.3817	0.4615	1.6863	0.3539	0.5265	0.6087	0.3106	0.5727	0.8066	1.0072
G	1.9459	0.7009	0.4719	0.4525	1.8609	0.6838	0.8932	0.6135	0.3228	0.7146	0.529	1.0503
H	2.1068	1.6215	1.794	1.6214	2.293	0.9993	1.4591	1.2066	1.3217	1.1904	1.2549	1.5886
End Time:	2020-01-02 13:52:16
User				umlub-Komputer\umlub
Plate				Corning 96 Flat Bottom Transparent Polystyrol [COS96ft.pdfx]
Plate-ID (Stacker)
Label: Label1
Mode				Absorbance
Wavelength				420	nm
Bandwidth				9	nm
Number of Flashes				25
Settle Time				0	ms
Start Time:	2020-01-02 13:52:46
	Temperature: 24.3 °C
<>	1	2	3	4	5	6	7	8	9	10	11	12
A	1.6613	1.2928	1.4869	1.3494	2.3438	1.033	1.8827	1.5379	1.7462	1.7102	2.2404	1.2114
B	1.5519	1.278	0.8746	1.2359	2.2534	0.853	1.462	1.3269	1.0801	1.2294	2.2252	1.0247
C	1.4602	1.1027	0.462	1.1384	1.676	0.9254	1.3956	0.9726	0.9939	1.2963	2.2776	0.957
D	1.4895	1.2056	1.2389	1.4983	2.1077	1.0015	1.4668	1.6388	1.6386	1.6838	2.0899	0.8875
E	1.4517	1.3011	1.5417	1.2522	1.9825	0.6834	1.0792	0.8358	0.9185	1.0129	1.3025	1.3812
F	1.2094	0.5129	0.387	0.46	1.7045	0.3589	0.5343	0.6172	0.3162	0.5812	0.8178	1.0212
G	1.923	0.6974	0.4787	0.4591	1.8813	0.691	0.9017	0.6199	0.3269	0.7197	0.534	1.059
H	2.1186	1.6366	1.8112	1.6305	2.2365	1.0063	1.461	1.2128	1.331	1.1995	1.2629	1.5968
End Time:	2020-01-02 13:54:03
Number of Flashes				25
Settle Time				0	ms
Start Time:	2020-01-02 13:54:24
	Temperature: 23.8 °C
<>	1	2	3	4	5	6	7	8	9	10	11	12
A	1.662	1.2956	1.4918	1.3513	2.3575	1.0338	1.8866	1.5413	1.7452	1.7119	2.2481	1.2107
B	1.5572	1.2833	0.8776	1.2404	2.2603	0.8542	1.4667	1.3301	1.0828	1.2346	2.2328	1.0292
C	1.4746	1.109	0.4644	1.1454	1.6833	0.9301	1.4033	0.9799	0.9663	1.2548	2.2841	0.9604
D	1.4659	1.2149	1.2476	1.5064	2.1158	1.0063	1.4761	1.6472	1.6425	1.6854	2.1	0.8895
E	1.459	1.2761	1.5523	1.2587	1.9878	0.6853	1.0854	0.8392	0.9241	1.0177	1.3086	1.3869
F	1.2171	0.5169	0.3834	0.4637	1.7183	0.3616	0.539	0.6224	0.3189	0.5862	0.8265	1.0329
G	1.9341	0.7016	0.4834	0.4626	1.8964	0.6779	0.9086	0.6238	0.329	0.7203	0.5377	1.0633
H	2.1298	1.6484	1.7635	1.6368	2.2523	1.0088	1.4663	1.2156	1.3357	1.2027	1.2662	1.5999
End Time:	2020-01-02 13:55:41
Application: Tecan i-control				Tecan i-control , 1.7.1.12
Device: infinite 200Pro				Serial number: 1105007938				Serial number of connected stacker:
Firmware: V_3.22_12/10_Infinite (Dec 14 2010/13.07.14)				MAI, V_3.22_12/10_Infinite (Dec 14 2010/13.07.14)
Date:	2019-12-17
Time:	15:53:36
System				UMLUB-KOMPUTER
User				umlub-Komputer\umlub
Plate				Nunclon 96 Flat Bottom Transparent Polystyrol [NUN96ft.pdfx]
Plate-ID (Stacker)
Label: Label1
Mode				Absorbance
Wavelength				420	nm
Bandwidth				9	nm
Number of Flashes				25
Settle Time				0	ms
Start Time:	2019-12-17 15:53:36
	Temperature: 25.9 °C
<>	1	2	3	4	5	6	7	8	9	10	11	12
A	0.121	0.1211	0.1145	0.0594	0.0927	0.1187	0.1684	0.1962	0.2106	0.0574	0.1599	0.1482
B	0.1161	0.1244	0.1011	0.0599	0.092	0.1117	0.1741	0.1899	0.2004	0.0554	0.1503	0.1472
C	0.1203	0.1218	0.1127	0.0544	0.0725	0.0763	0.2118	0.203	0.1851	0.0592	0.1839	0.1525
D	0.1143	0.1529	0.1304	0.0549	0.0711	0.1099	0.2305	0.2067	0.2249	0.0558	0.2102	0.1943
E	0.1884	0.1486	0.1714	0.0557	0.1756	0.1467	0.0997	0.0958	0.1083	0.1432	0.1152	0.1687
F	0.214	0.1718	0.1895	0.0648	0.1592	0.1507	0.0919	0.0823	0.1007	0.1663	0.114	0.1565
G	0.208	0.1504	0.1706	0.0532	0.1358	0.1203	0.1021	0.094	0.1249	0.151	0.1108	0.1528
H	0.2544	0.2063	0.2011	0.0557	0.2011	0.1371	0.1203	0.1012	0.1518	0.2082	0.1484	0.2117
End Time:	2019-12-17 15:54:53
Application: Tecan i-control				Tecan i-control , 1.7.1.12
Device: infinite 200Pro				Serial number: 1105007938				Serial number of connected stacker:
Firmware: V_3.22_12/10_Infinite (Dec 14 2010/13.07.14)				MAI, V_3.22_12/10_Infinite (Dec 14 2010/13.07.14)
Date:	2019-12-17
Time:	15:55:14
System				UMLUB-KOMPUTER
User				umlub-Komputer\umlub
Plate				Nunclon 96 Flat Bottom Transparent Polystyrol [NUN96ft.pdfx]
Plate-ID (Stacker)
Label: Label1
Mode				Absorbance
Wavelength				420	nm
Bandwidth				9	nm
Number of Flashes				25
Settle Time				0	ms
Start Time:	2019-12-17 15:55:14
	Temperature: 26 °C
<>	1	2	3	4	5	6	7	8	9	10	11	12
A	0.1191	0.1202	0.1129	0.0585	0.0913	0.1169	0.167	0.1956	0.2095	0.0565	0.1589	0.1472
B	0.1144	0.1233	0.0995	0.0589	0.0904	0.1103	0.1722	0.1888	0.1988	0.0547	0.148	0.1452
C	0.1188	0.1206	0.1112	0.0535	0.0707	0.0747	0.2098	0.2013	0.1832	0.0583	0.1819	0.1507
D	0.1131	0.1517	0.1281	0.054	0.0696	0.108	0.2287	0.2056	0.2235	0.0557	0.2079	0.1926
E	0.1868	0.1472	0.1693	0.0548	0.1735	0.145	0.0981	0.0941	0.1066	0.1418	0.1135	0.1677
F	0.212	0.1705	0.1872	0.0631	0.1543	0.1497	0.0897	0.0805	0.0985	0.1649	0.1109	0.1551
G	0.2069	0.1492	0.1685	0.0525	0.1368	0.1185	0.1004	0.0923	0.1234	0.1493	0.1087	0.1522
H	0.2534	0.2056	0.2003	0.0544	0.1995	0.1354	0.1188	0.0999	0.1491	0.2069	0.1461	0.2099
Application: Tecan i-control				Tecan i-control , 1.7.1.12
Device: infinite 200Pro				Serial number: 1105007938				Serial number of connected stacker:
Firmware: V_3.22_12/10_Infinite (Dec 14 2010/13.07.14)				MAI, V_3.22_12/10_Infinite (Dec 14 2010/13.07.14)
Date:	2019-12-17
Time:	15:51:48
System				UMLUB-KOMPUTER
User				umlub-Komputer\umlub
Plate				Nunclon 96 Flat Bottom Transparent Polystyrol [NUN96ft.pdfx]
Plate-ID (Stacker)
Label: Label1
Mode				Absorbance
Wavelength				420	nm
Bandwidth				9	nm
Number of Flashes				25
Settle Time				0	ms
Start Time:	2019-12-17 15:51:48
	Temperature: 25.8 °C
<>	1	2	3	4	5	6	7	8	9	10	11	12
A	0.1247	0.1217	0.1163	0.0605	0.0946	0.121	0.1702	0.1972	0.2127	0.0589	0.1618	0.1502
B	0.12	0.1266	0.1042	0.0621	0.0949	0.1145	0.1773	0.1925	0.2034	0.0572	0.1541	0.1503
C	0.1235	0.1244	0.1156	0.0562	0.0757	0.0795	0.2152	0.2053	0.1882	0.0612	0.1869	0.1559
D	0.1172	0.1556	0.1346	0.0571	0.0741	0.114	0.2341	0.2095	0.2279	0.0573	0.2147	0.1977
E	0.1919	0.1515	0.1755	0.0579	0.1798	0.1507	0.1029	0.0992	0.1116	0.1461	0.1188	0.171
F	0.2181	0.1752	0.194	0.0683	0.1685	0.154	0.0973	0.086	0.1048	0.1697	0.121	0.16
G	0.2112	0.1538	0.1755	0.0557	0.1364	0.1246	0.1062	0.0981	0.1286	0.1551	0.1161	0.1553
H	0.2578	0.2092	0.2036	0.0575	0.205	0.1408	0.1241	0.1039	0.1564	0.2117	0.153	0.2163
End Time:	2019-12-17 15:53:06

## Sheet: qPCR
	Twist1	YBX1	twist SD	ybx SD
SW480	ns	0.283523		0.0159218
HK99	0.00610586	0.152412	0.000291068	0.00821319
HEK293S	0.00561854	0.356064	0.000267838	0.00740374
HeLa	0.0282357	0.407262	0.000735708	0.0153788
SW640	ns	0.391439		0.00787719
HEK293T	0.0157777	0.531062	0.00059579	0.0129042
A549	0.000748375	0.0794779	0.000169628	0.000637586
HK-2	0.00312827	0.223891	0.000351903	0.0109691
RCI24	0.000622625	0.156418	0.000622625	0.00273307
A375	0.00423875	0.244354	0.000409776	0.0068675
H2170	0.0211524	0.353707	0.00182743	0.0128691
DLD1	ns	0.342559		0.0441947
	Twist1	YBX1	twist SD	ybx SD
HeLa	0.0282357	0.407262	0.000735708	0.0153788
HEK293T	0.0157777	0.531062	0.00059579	0.0129042
RCI24	0.000622625	0.156418	0.000622625	0.00273307
HeLa	HEK293	RC-124	HK-2
0.0285572	0.00592077	0.00287943	0.000648772
0.0273939	0.00552427	0.0033771	0.000613776
0.0287559	0.00541058		0.000605326

[truncated: 2 more sheets: MTT, Flow Cyt]
